# Supplementary material
Source: Springer Nature journal article supplement (https://www.springermedizin.de/resource/supplementary/12937_2011_442_MOESM2_ESM.pdf/25653116)

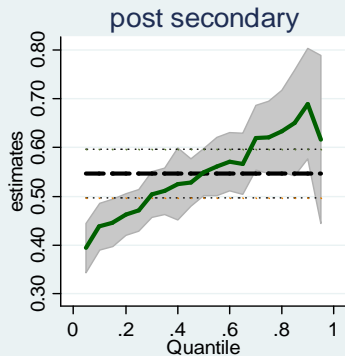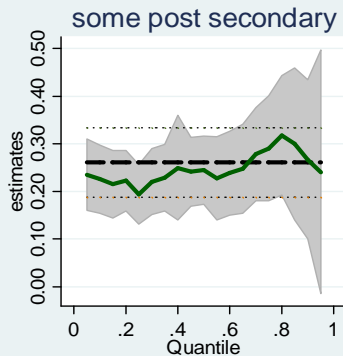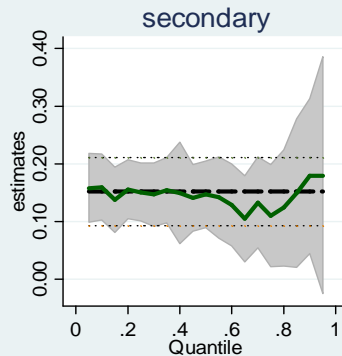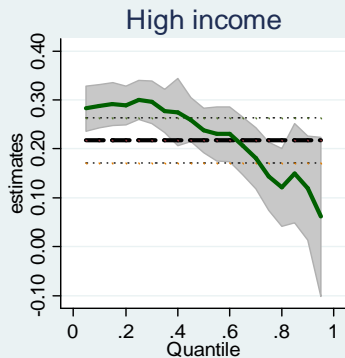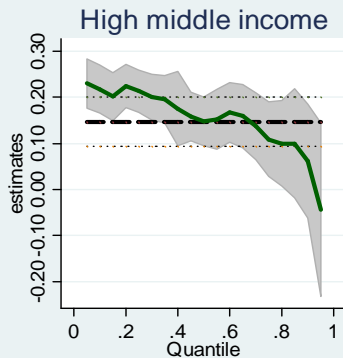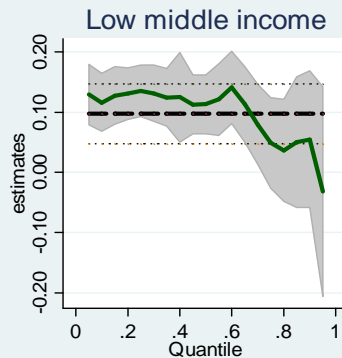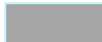

90% confidence region

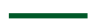

quantile estimate

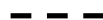

OLS estimate

Supplement: MOESM2 [file 25653116]
